# Supplementary material for: Food Safety Conditions in Home-Kitchens: A Cross-Sectional Study in the Federal District/Brazil
Source: MDPI journal article supplement (doi:10.3390/ijerph17134897), 2020-07-07
Supplement: s1 [file s1]

**Table S1.** Frequency of conformities and nonconformities in home kitchens in the Federal District/Brazil classified as group 3 by the instrument, 2019 (*n* = 06).

| Checklist Section                                                                                                                         | Conformity<br>% | Nonconformity<br>% |
|-------------------------------------------------------------------------------------------------------------------------------------------|-----------------|--------------------|
| Block 1 - Construction and Facilities                                                                                                     |                 |                    |
| External area free of outbreaks of unhealthiness, garbage accumulation, stagnant water, among others.                                     | 100             | 0                  |
| Access roads with adequate sewage system.                                                                                                 | 83.3            | 16.7               |
| Kitchen free of obsolete objects or strangers to the environment.                                                                         | 33.3            | 66.7               |
| Free of the presence of domestic animals.                                                                                                 | 50              | 50                 |
| Kitchen floor - In good state of cleanliness.                                                                                             | 83.3            | 16.7               |
| Kitchen floor - Cleaned at least once a day.                                                                                              | 66.7            | 33.3               |
| Kitchen floor - Floor in material that facilitates its cleaning (ceramics or similar).                                                    | 66.7            | 33.3               |
| Kitchen floor - In suitable state of conservation (free of defects, cracks, cracks, holes, and others).                                   | 33.3            | 66.7               |
| Kitchen Ceiling - With appropriate ceiling material that facilitate cleaning (plaster, pvc, concrete, or similar).                        | 33.3            | 66.7               |
| Kitchen Ceiling - In suitable state of conservation (free of cracks, humidity, mold, fungus, spider webs, paint peel, and others).        | 16.7            | 83.3               |
| Kitchen walls and divisions - In good state of cleanliness.                                                                               | 33.3            | 66.7               |
| Kitchen walls and divisions - In suitable state of conservation (free of cracks, humidity, paint peel, and others).                       | 33.3            | 66.7               |
| Kitchen door - In suitable state of conservation (free of cracks, humidity, paint peel, and others).                                      | 0               | 100                |
| Kitchen door - Built with material of easy cleansing.                                                                                     | 50              | 50                 |
| Windows and other kitchen openings - In suitable state of conservation (free of cracks, humidity, paint peel, and others).                | 33.3            | 66.7               |
| Windows and other kitchen openings - Built with material of easy cleansing.                                                               | 16.7            | 83.3               |
| Toilets - Toilet with intact toilet seat and with lid.                                                                                    | 33.3            | 66.7               |
| Toilets - Toilet with running water and connected to the sewage system or septic tank.                                                    | 66.7            | 33.3               |
| Toilets - Toilet without direct link to the kitchen area and/or the dining room.                                                          | 83.3            | 16.7               |
| Toilets - Toilet with bins with lids and pedal triggering.                                                                                | 16.7            | 83.3               |
| Lightening and kitchen electrical wiring - Recessed lighting or when external, covered by insulating pipes attached to walls and ceiling. | 0               | 100                |
| Lightening and kitchen electrical wiring - Bulbs and electric switches free of dirt.                                                      | 16.7            | 83.3               |

|                                                                                                                       |      |      |
|-----------------------------------------------------------------------------------------------------------------------|------|------|
| Lightening and kitchen electrical wiring - Cleaning of lamps, outlets, and electric switches at least once a month.   | 16.7 | 83.3 |
| Ventilation and acclimatization system of the kitchen - Capable of thermal comfort.                                   | 0    | 100  |
| Ventilation and acclimatization system of the kitchen - Kitchen free of fungus, causing no harm to food.              | 50   | 50   |
| Urban vector and pest control - Absence of urban vectors and pests or other evidence such as feces, nests, and other. | 16.7 | 83.3 |
| Urban vector and pest control - Disinfecting every six months.                                                        | 33.3 | 66.7 |
| Water supply - Water supply system connected to the public grid.                                                      | 66.7 | 33.3 |
| Water supply - Proper, protected, covered, and distant from contamination water system.                               | 66.7 | 33.3 |
| Water supply - Water tank with lid and in good state.                                                                 | 0    | 100  |
| Water supply - Cleaning of water tank every six months.                                                               | 16.7 | 83.3 |
| Waste management - Easy to clean and carry waste bins; in proper state and with appropriate garbage bags.             | 16.7 | 83.3 |
| Waste management - Covered waste bins with pedal triggering.                                                          | 0    | 100  |
| Waste management - No waste bins over the sink.                                                                       | 50   | 50   |
| Waste management - Waste stored in appropriate areas.                                                                 | 66.7 | 33.3 |
| Sanitary sewage - Septic tank and sewage system connected to the public sewage.                                       | 66.7 | 33.3 |
| Block 2 - Equipment, furniture and kitchen utensils                                                                   |      |      |
| Equipment - Fridge and stove in an area that permits adequate cleaning.                                               | 33.3 | 66.7 |
| Equipment - Conservation equipment for food (fridges, freezers, and others) in proper functioning.                    | 66.7 | 33.3 |
| Equipment - Thermal food equipment (stove, oven, and/or microwave) in proper functioning.                             | 50   | 50   |
| Furniture - From resistant material with proper surface conditions.                                                   | 83.3 | 16.7 |
| Furniture - Withdrawing that allows easy cleaning (smooth, without roughness, and chinks).                            | 50   | 50   |
| Utensils - Size and shape for easy cleaning and in proper state.                                                      | 83.3 | 16.7 |
| Utensils - No wooden utensils or other materials of easy contamination.                                               | 50   | 50   |
| Utensils - Pans, pots, and trays in proper state.                                                                     | 50   | 50   |
| Utensils - Boards, knives, skimmers, and holders in proper state.                                                     | 50   | 50   |
| Utensils - Utensils (plates, silverware, bowls) in proper state.                                                      | 50   | 50   |
| Equipment, furniture and utensils hygiene: Fridges and freezers in proper state.                                      | 50   | 50   |
| Fridges or freezers cleaned at least once a week.                                                                     | 33.3 | 66.7 |
| The stove is cleaned when used.                                                                                       | 50   | 50   |

|                                                                                                                   |      |      |
|-------------------------------------------------------------------------------------------------------------------|------|------|
| Dishcloths in proper and cleaned state.                                                                           | 50   | 50   |
| Dishrags or table rags in proper state.                                                                           | 50   | 50   |
| Dishcloths are changed daily.                                                                                     | 50   | 50   |
| Dishrags are changed daily.                                                                                       | 33.3 | 66.7 |
| Cleaning sponges in proper hygiene and state.                                                                     | 0    | 100  |
| Cleaning sponges changed weekly.                                                                                  | 33.3 | 66.7 |
| Cleaning products approved by the health department.                                                              | 33.3 | 66.7 |
| Cleaning products in their original packing and stored in proper location.                                        | 33.3 | 66.7 |
| Equipment, furniture, and kitchen utensils in proper hygiene and state.                                           | 66.7 | 33.3 |
| Water filters changed every six months.                                                                           | 50   | 50   |
| No sponges from steel or wool.                                                                                    | 66.7 | 33.3 |
| Block 3 - Handlers                                                                                                |      |      |
| Personal cleaning, good appearance, clean hands, short nails, and unadorned (rings, earrings, bracelets, others). | 50   | 50   |
| Handlers with previous knowledge on hand washing.                                                                 | 16.7 | 83.3 |
| Absence of skin rash, wound, suppuration; absence of respiratory, eye, and gastric infections.                    | 16.7 | 83.3 |
| Block 4 - Food and feedstock                                                                                      |      |      |
| Food and feedstock with labels and packaging according to legislation.                                            | 100  | 0    |
| Milk from a secure source.                                                                                        | 83.3 | 16.7 |
| Cheese from a secure source, packed and labeled.                                                                  | 83.3 | 16.7 |
| Meat, chicken, or fish from proper establishments.                                                                | 83.3 | 16.7 |
| Filtered or boiled water consumption.                                                                             | 83.3 | 16.7 |
| Semi perishable food stored in adequate and organized area with air circulation and lighting.                     | 16.7 | 83.3 |
| Food prepared in advance before serving heated again.                                                             | 16.7 | 83.3 |
| Fridges and freezers organized in order to avoid cross contamination.                                             | 16.7 | 83.3 |
| Feedstock not used completely are properly stored in clean and closed container.                                  | 16.7 | 83.3 |
| Feedstock not used completely are identified with expiration date.                                                | 16.7 | 83.3 |
| Perishable food stored in adequate temperature.                                                                   | 16.7 | 83.3 |
| Packages well cleaned before used for fridge or freeze storage.                                                   | 16.7 | 83.3 |
| Leftovers stored under refrigeration and with bowls with lids.                                                    | 16.7 | 83.3 |
